# Supplementary material
Source: publisher site journal article supplement (https://www.dovepress.com/article/344491)
Supplement: Supplementary file 1 [file get_supplementary_file.php]

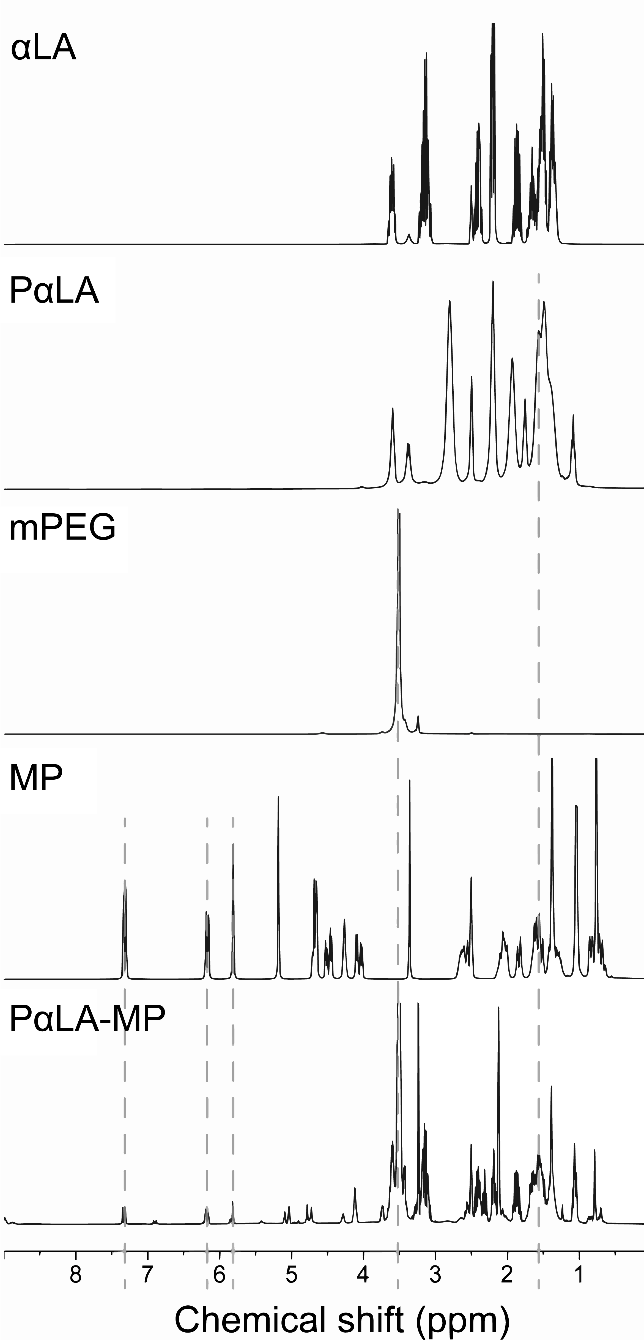


**Figure S1:** 1H NMR spectra of αLA, PαLA, mPEG, MP, and PαLA-MP in DMSO-*d*6.


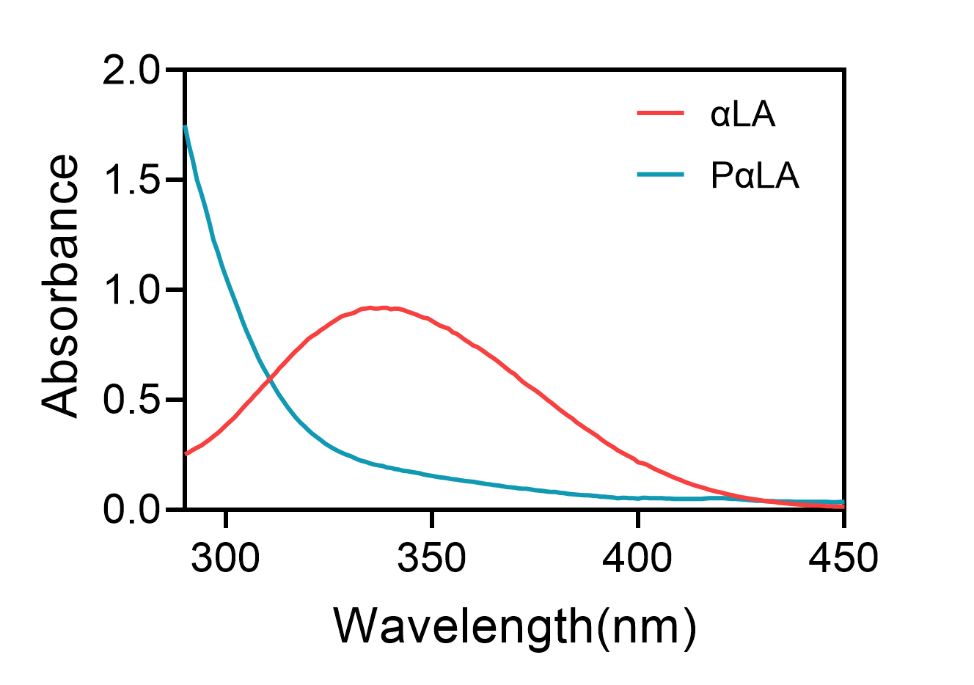


**Figure S2:** UV–Vis spectra of αLA and PαLA in DMSO.


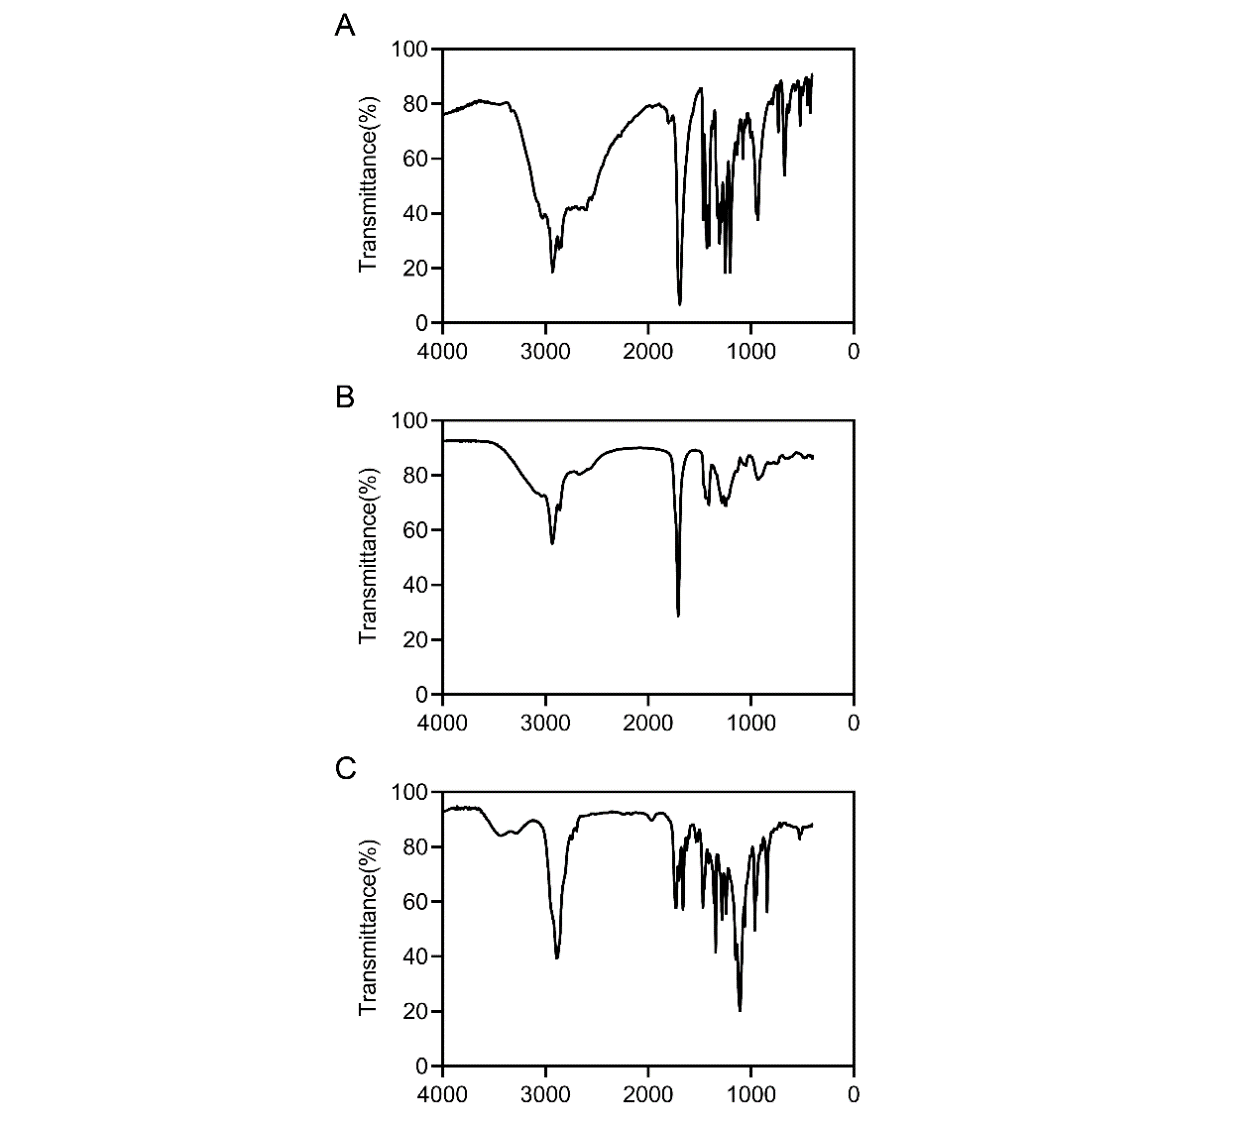


**Figure S3:** FT-IR spectra of αLA (A), PαLA (B), and PαLA-MP (C).


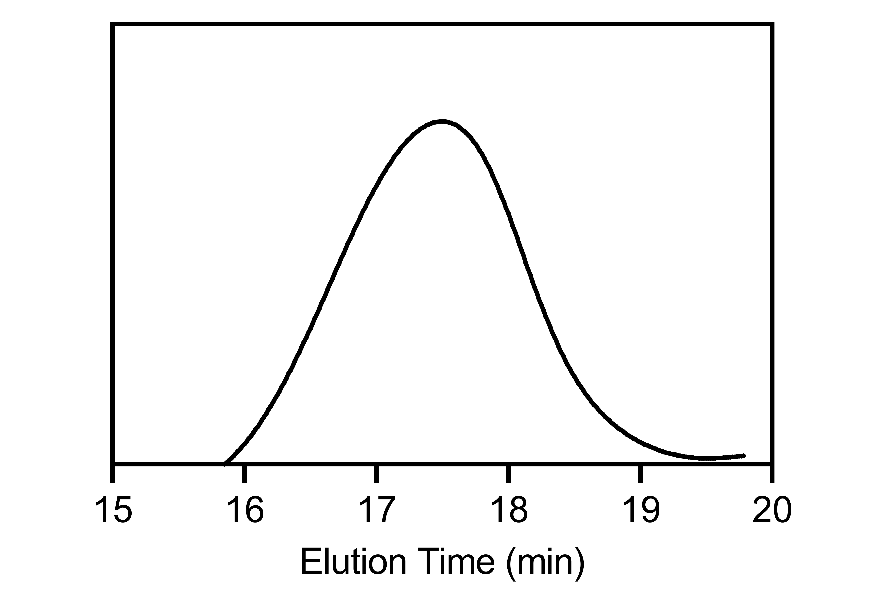


**Figure S4:** GPC analysis of PαLA-MP using DMF as the eluent.


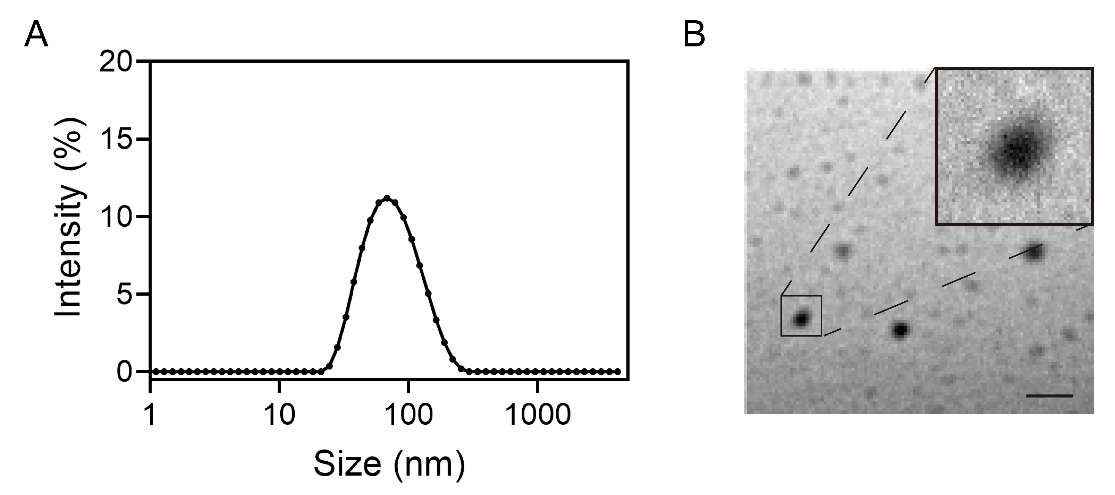


**Figure S5:** (A) DLS measurement of PαLA-MP NPs. (B) TEM image of PαLA-MP NPs. Higher magnification TEM images are presented on the right (4×). Scale bars are 200 and 50 μm, respectively.


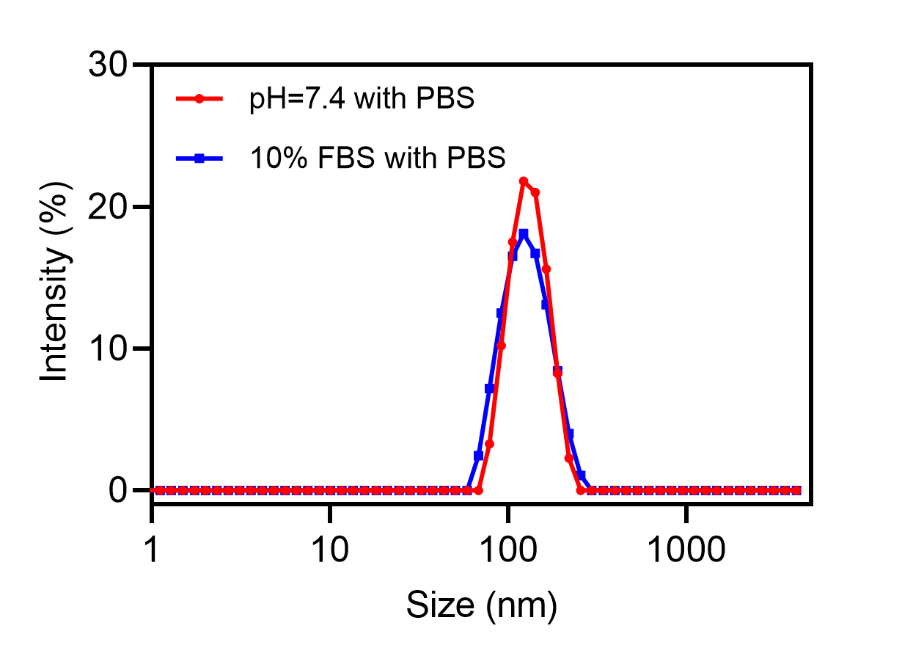


**Figure S6:** Stability of MC-PαLA-MP NPs in different media.


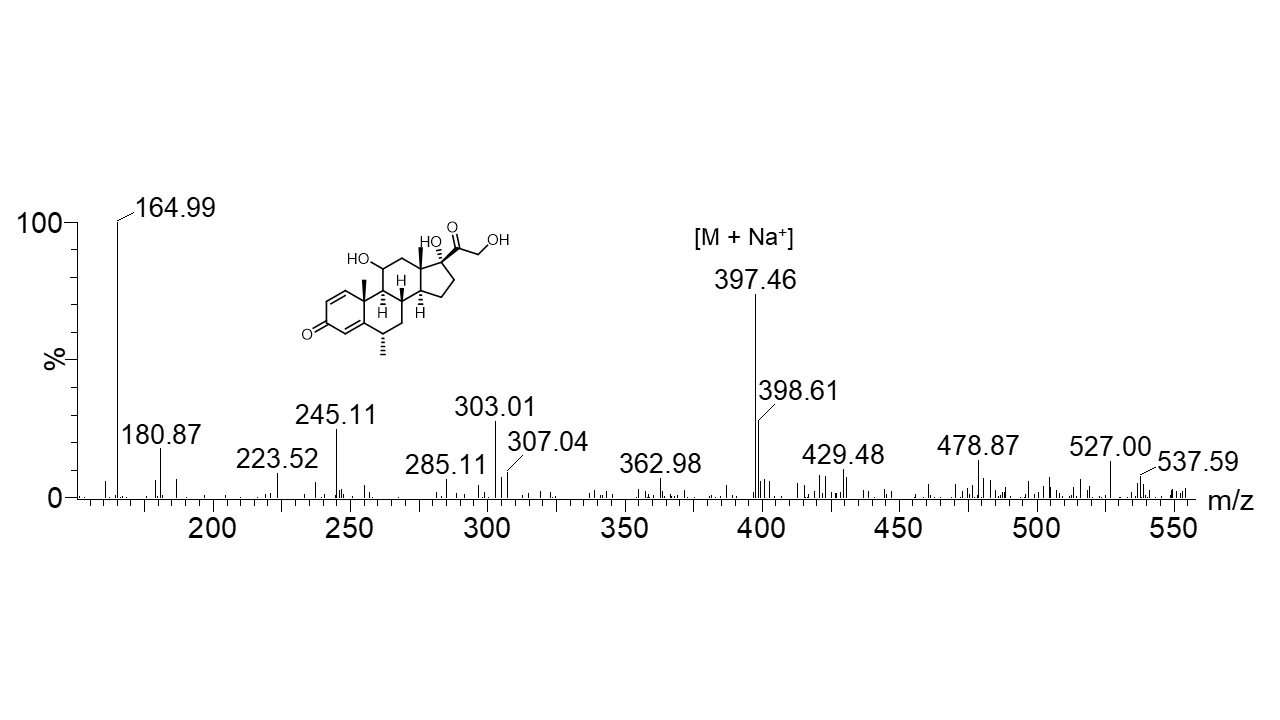


**Figure S7:** ESI-MS results of MP in the solution released after 48 h.


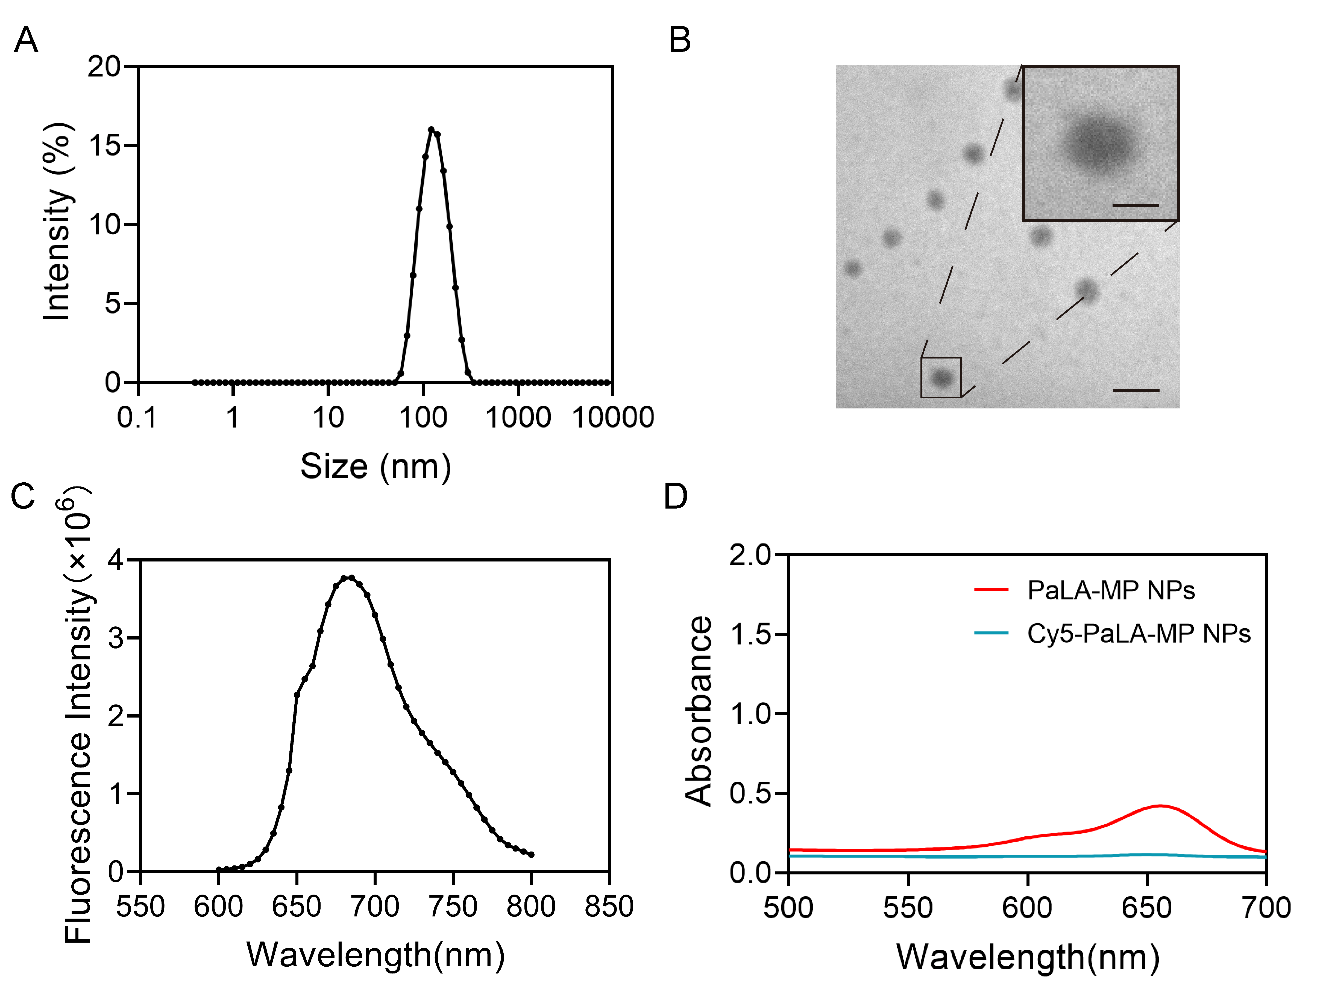


**Figure S8:** (A) DLS measurement of Cy5-PαLA-MP NPs. (B) TEM image of Cy5-PαLA-MP NPs. Higher magnification TEM images are presented on the right (4×). Scale bars are 200 and 50 μm, respectively. (C) Fluorescence of Cy5-PαLA-MP NPs. (D) UV–Vis spectra of PαLA-MP NPs and Cy5-PαLA-MP NPs.


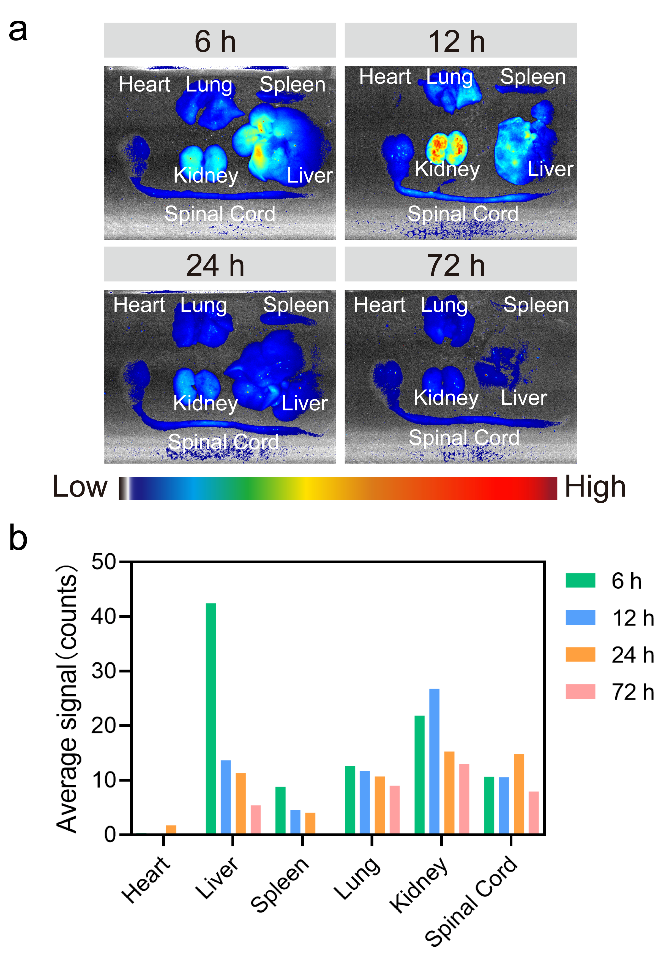


**FigureS9:** (A) Biodistribution of Cy5-PαLA-MP NPs in rat models of TSCI. (B) Average signals were counted in the major organs after an intravenous injection with Cy5-PαLA-MP NPs.


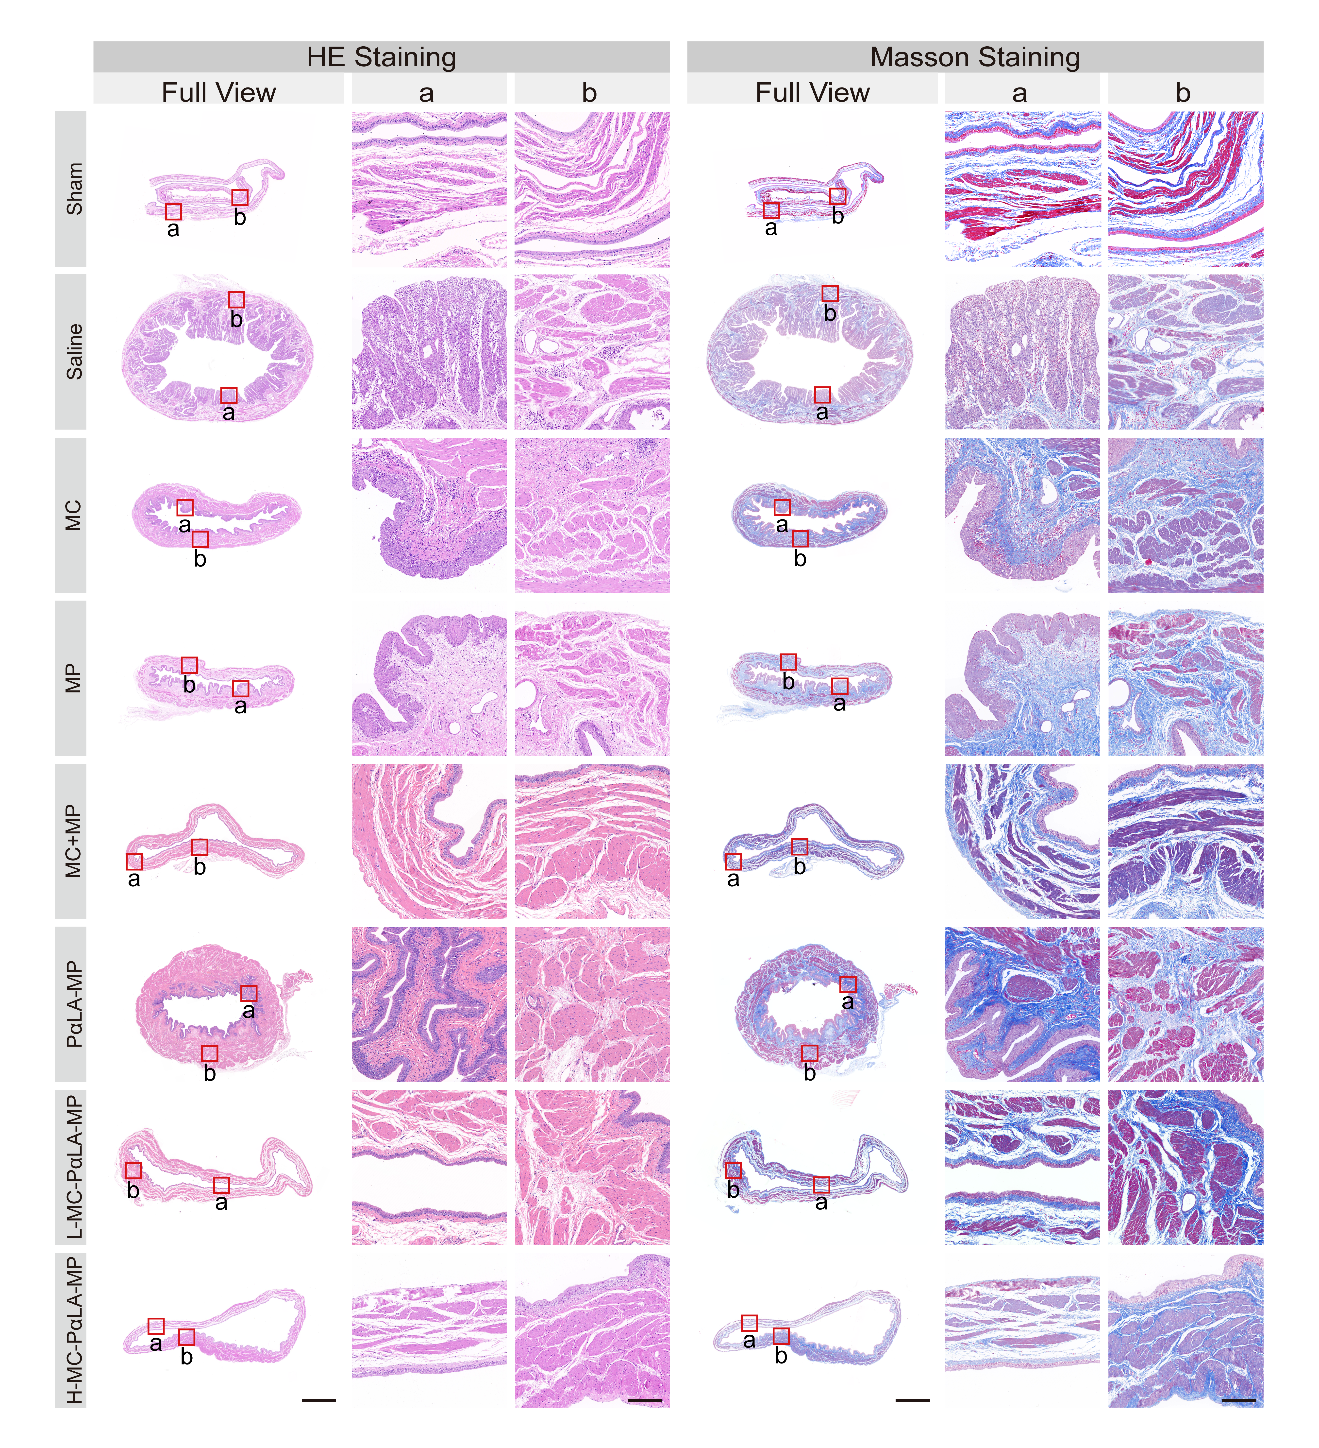


**Figure S10:** H&E and Masson staining results of bladders at 2× (left) and 20× (right) magnifications. Scale bars are 500 and 50 μm, respectively.


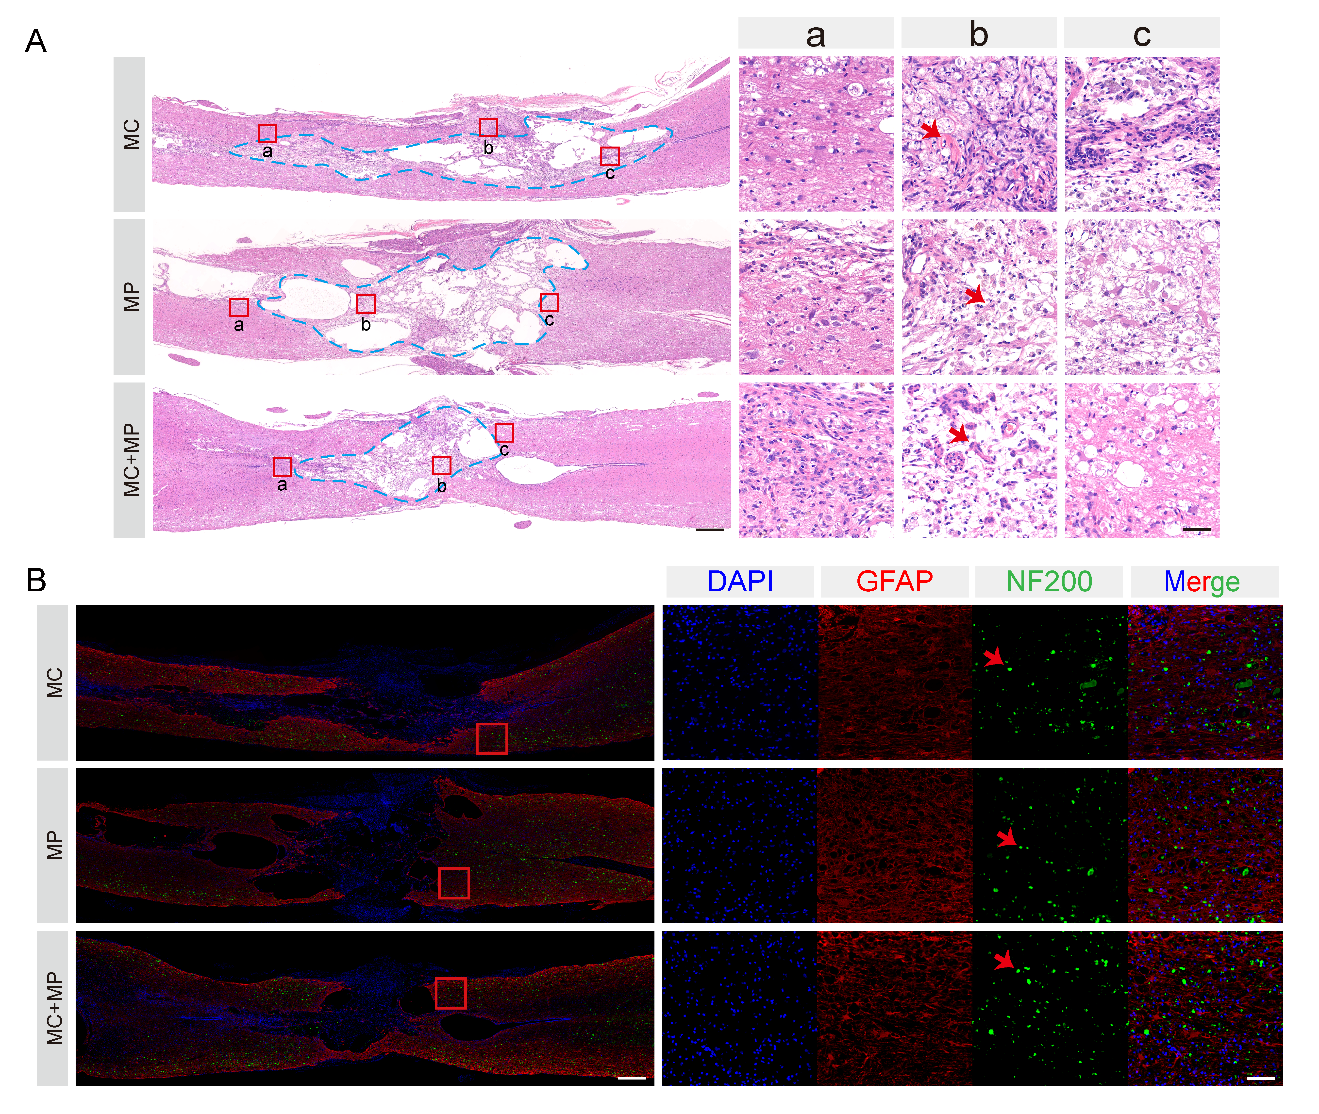
 **Figure S11:** (A) H&E staining of injured spinal cord displayed at 2× (left) and 20× (right) magnifications. Scale bars are 500 and 50 μm, respectively. (B) Immunofluorescence staining images of GFAP (red) and NF200 (green) in the injured spinal cord shown at 2× (left) and 10× (right) magnifications. Scale bars are 500 and 100 μm, respectively. Arrows indicated the pathological characteristics.


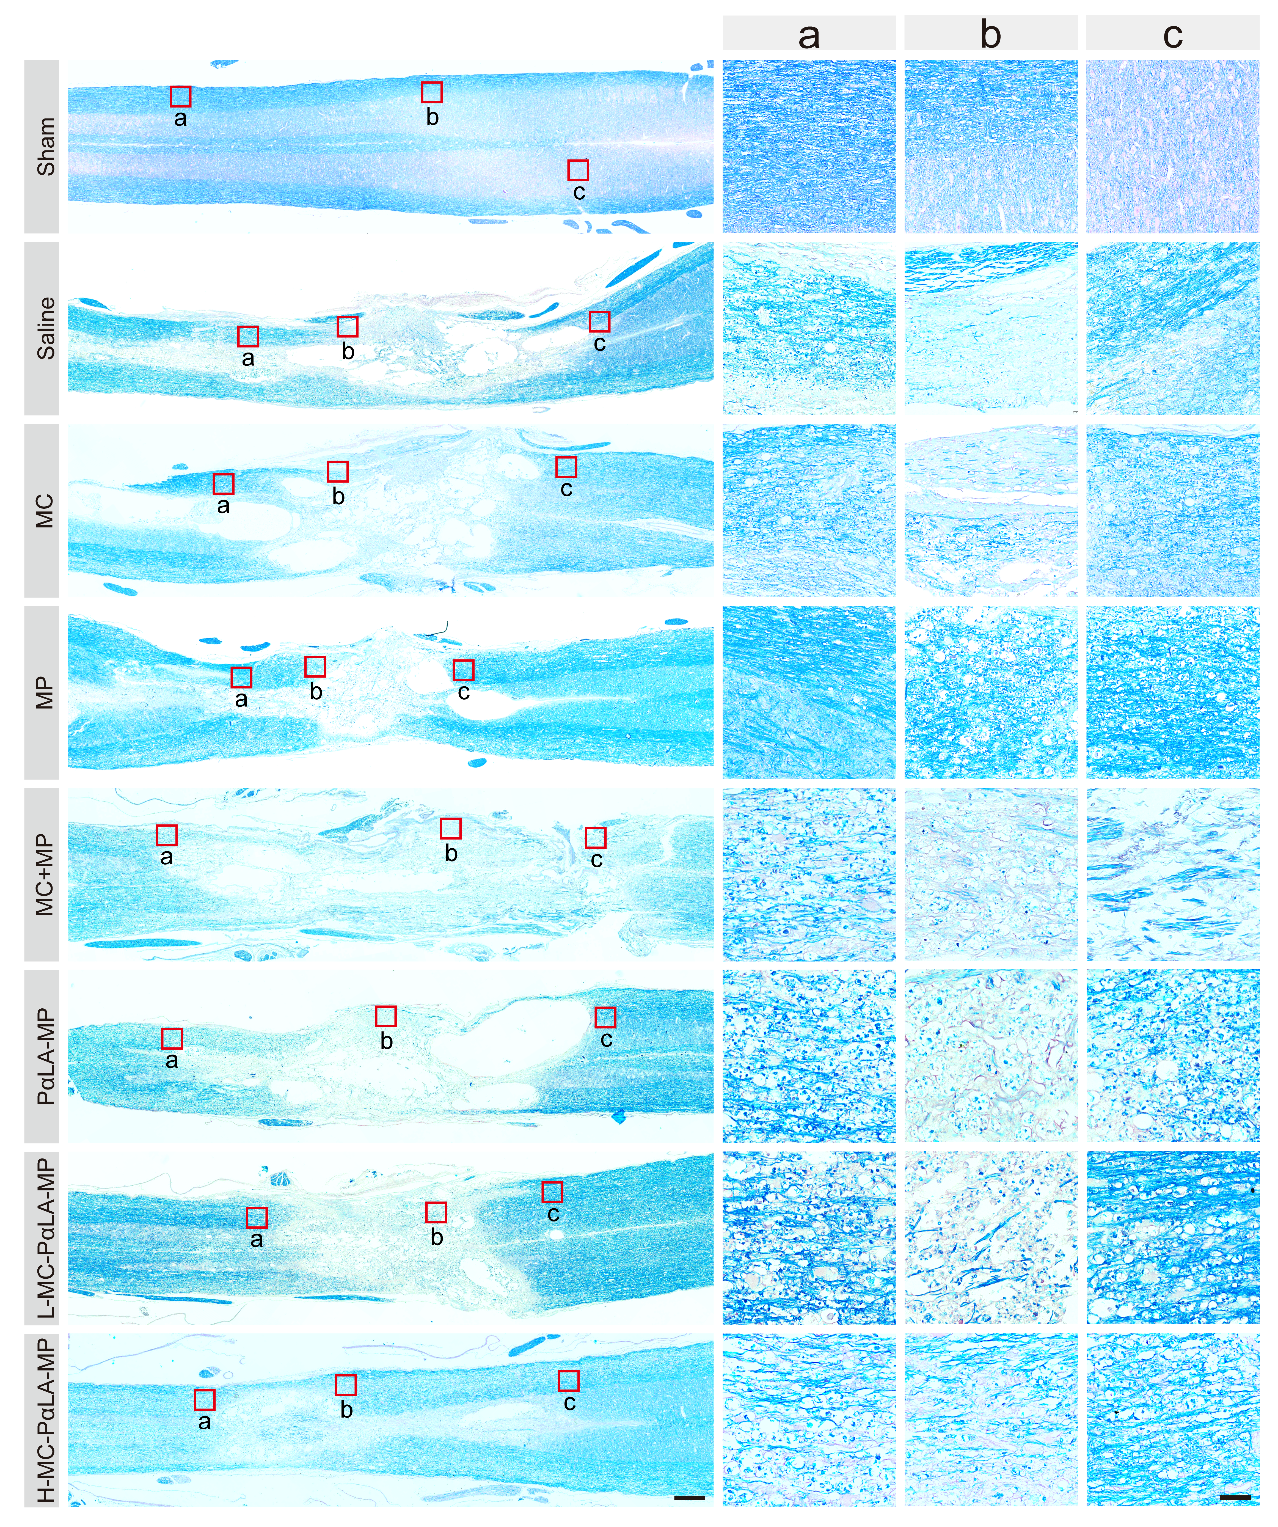


**Figure S12:** LFB staining of injured spinal cord displayed at 2× (left) and 20× (right) magnifications. Myelinated areas are stained blue, whereas demyelinated areas are unstained. The scale bars are 500 μm (left panels) and 50 μm (right panels).


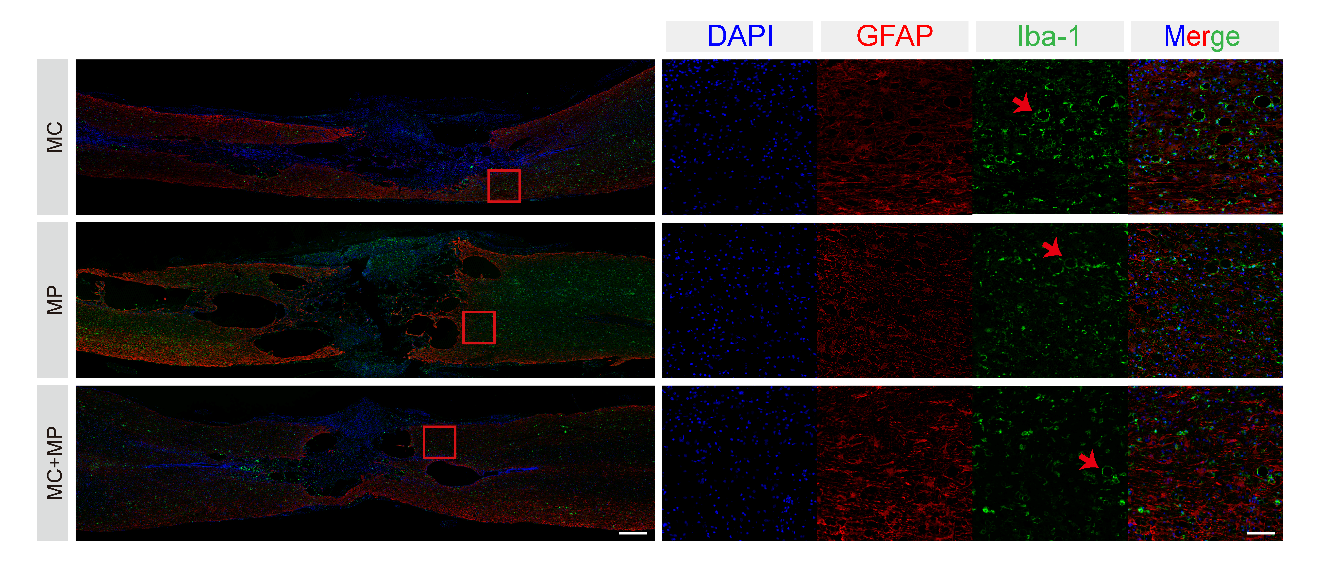


**Figure S13:** Immunofluorescence staining images of GFAP (red) and Iba1 (green) in the injured spinal cord shown at 2× (left) and 10× (right) magnifications. Scale bars are 500 and 100 μm, respectively. Arrows indicated the pathological characteristics.


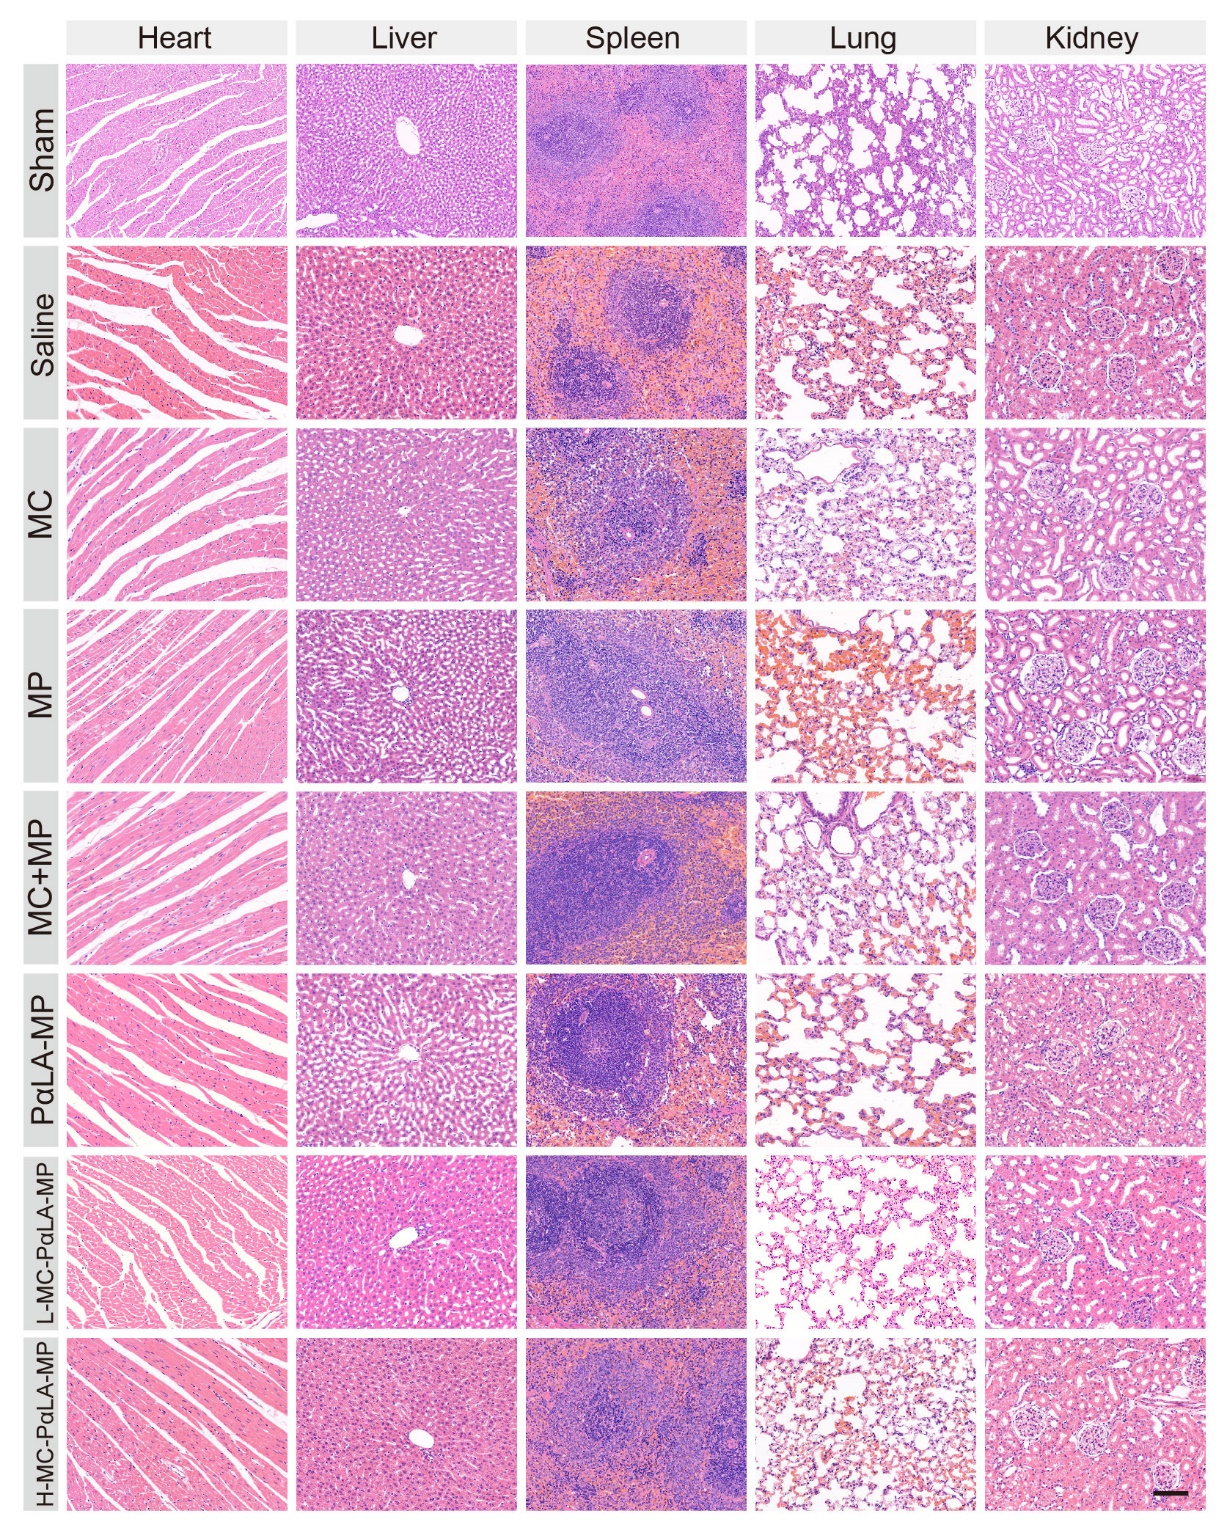


**Figure S14:** H&E staining of the major organs from rat models of TSCI at the end of treatment. Scale bar = 100 μm.
